# Supplementary material for: Anterior-posterior differences in HoxD chromatin topology in limb development
Source: Oxford University Press journal article supplement (doi:10.1242/dev.081174), 2012-08-07
Supplement: dev081174tables1-s8.pdf [file dev081174tables1-s8.pdf]

**Table S1. Real-time PCR primers for analysis of transcript levels**

| <b>Gene</b>   | <b>Oligo name</b> | <b>Sequence</b>          | <b>Reference</b>                    |
|---------------|-------------------|--------------------------|-------------------------------------|
| <i>Hoxd1</i>  | d1bUp             | CCACAGCACTTTTCGAGTGGA    | Morey et al., 2007                  |
| <i>Hoxd1</i>  | Hoxd1r            | ACTCTTTCTCTAGCTCTGTCAG   |                                     |
| <i>Hoxd3</i>  | d3pA              | GAACTCCAAGCAGAAGAACAG    | Condie and Capecchi, 1993           |
| <i>Hoxd3</i>  | Hoxd3r            | CAGATAGCGGTTGAAGTGAAC    |                                     |
| <i>Hoxd4</i>  | Hoxd4f            | GGAGAACGAGGGAGAACCA      |                                     |
| <i>Hoxd4</i>  | Hoxd4r            | TCTGCTGCTGCTATGACTGC     |                                     |
| <i>Hoxd8</i>  | Hoxd8f            | CACTTAAATCAGAGCTCGTCTCC  |                                     |
| <i>Hoxd8</i>  | Hoxd8r            | GACCTCGATTCTCCTCTTCCTGG  |                                     |
| <i>Hoxd10</i> | Hoxd10f           | GTGCAGGAGAAGGAAAGCAAAG   | Modified from Mizusawa et al., 2004 |
| <i>Hoxd10</i> | Hoxd10r           | TAACGCTCTTACTGATCTCTAGGC |                                     |
| <i>Hoxd11</i> | Hoxd11f           | TCCAGGCAAACGAGAGAAAC     |                                     |
| <i>Hoxd11</i> | Hoxd11r           | TTGGCAAATAAGGTTTCTGGA    |                                     |
| <i>Hoxd12</i> | Hoxd12f           | CAACTTGAACATGGCAGTGCAAG  |                                     |
| <i>Hoxd12</i> | Hoxd12r           | CTGCTGCTTTGTGTAGGGTTTCC  |                                     |
| <i>Hoxd13</i> | Hoxd13f           | AGTCCTGGACGCTAGCCAACG    |                                     |
| <i>Hoxd13</i> | Hoxd13r           | GTAGACGCACATGTCCGGCTG    |                                     |
| <i>Actin</i>  | Actinf            | AGAGCTATGAGCTGCCTGACG    |                                     |
| <i>Actin</i>  | Actinr            | TGTGTTGGCATAGAGGTCTTTACG |                                     |
| <i>Lnp</i>    | LnpaUp            | GTGGAAGGCTCAAGCTCAAC     |                                     |
| <i>Lnp</i>    | LnpbLo            | TGCTGGGCAATCTGAATATG     |                                     |
| <i>GAPDH</i>  | GABDHf            | ATCACCATCTTCCAGGAGCGAG   |                                     |
| <i>GAPDH</i>  | GABDHr            | GACCCTTTTGGCTCCACCCTTC   | Modified from Boyer et al., 2006    |
| <i>FgfR2b</i> | FGFR2f            | CTGTTCAATGTGACGGAGATGG   |                                     |
| <i>FgfR2b</i> | FGFR2r            | ACAGACGCGTTGTTAYCCTCAC   |                                     |
| <i>FgfR2c</i> | FGF2Cf            | CACTCTGCATGGTTGACAGTTC   |                                     |
| <i>FgfR2c</i> | FGF2Cr            | CACTCTGCATGGTTGACAGTTC   |                                     |
| <i>Fgf8</i>   | FGF8f             | AAAGTCACACAGCGACATGTGAGG |                                     |
| <i>Fgf8</i>   | FGF8r             | TCTGTGAATACGCAGTCCTTGCCT |                                     |
| <i>Fgf10</i>  | FGF10f            | AGCGGGACCAAGAATGAAGACTGT |                                     |
| <i>Fgf10</i>  | FGF10r            | CCTGCCATTGTGCTGCCAGTAAA  |                                     |
| <i>Etv4</i>   | Pea3f             | ACCATGGAGAGCAGTGCCTTTACT |                                     |
| <i>Etv4</i>   | Pea3r             | ATGCACATCCAGGGACATCTGAGT |                                     |

**Table S2. Real-time PCR primers for ChIP analysis of promoter regions**

| <b>Promoter/exon</b> | <b>Oligo name</b> | <b>Sequence</b>         | <b>Reference</b>   |
|----------------------|-------------------|-------------------------|--------------------|
| <i>Hoxd1</i>         | Hoxd1promf        | GAGTAACTTGACCTTCTCAGAG  |                    |
|                      | Hoxd1promr        | ATTGCGGGAGAAAGGCAGGGAAG |                    |
| <i>Hoxd10</i>        | Hoxd10prof        | TAGTAGATGTCGCTGTTGTCCG  |                    |
|                      | Hoxd10pror        | ACATGACAACCAAGCCAATGAGA |                    |
| <i>Olig2</i>         | Olig2f            | GCCTGACGCTACAGTGACAA    | Boyer et al., 2006 |
|                      | Olig2r            | GGCTAATTCCGCTCAATGAA    | Boyer et al., 2006 |
| <i>Actin</i>         | Actinf            | CCTCGATGCTGACCCTCATCC   |                    |
|                      | Actinr            | GACACTGCCCCATTCAATGTCTC |                    |

**Table S3. Fosmid probes**

|             |                     | Whitehead (Sanger) |                |             |           |           |
|-------------|---------------------|--------------------|----------------|-------------|-----------|-----------|
|             | Region              | name               | Ensemble name  | Coordinates |           | Size (bp) |
|             |                     |                    |                | Start       | End       |           |
| <b>Hoxd</b> | <i>GCR*</i>         | WI1-2157A11        | G135P63331H7   | 74242615    | 74282044  | 39,429    |
|             | <i>Lnp*</i>         | WI1-482L15         | G135P61870C5   | 74329582    | 74372986  | 43,404    |
|             | <i>Evx2-Hoxd13*</i> | WI1-469P2          | G135P67444A12  | 74474157    | 74513003  | 38,846    |
|             | <i>Hoxd4-Hoxd1*</i> | WI1-121N10         | G135P67844B8   | 74566983    | 74605438  | 38,455    |
|             | <i>Island III</i>   | WI1-1404J11        | G135P64810D7   | 74040543    | 74081331  | 40,788    |
| <b>Pax6</b> | <i>Rcn**</i>        | WI1-1767E4         | G135P601417F11 | 105221381   | 105259938 | 38,557    |
|             | <i>Rpl10**</i>      | WI1-1550J22        | G135P601672D2  | 105387894   | 105425103 | 37,209    |

Names are Ensembl (r 45) ([http://jun2007.archive.ensembl.org/Mus\\_musculus/index.html](http://jun2007.archive.ensembl.org/Mus_musculus/index.html)). Mouse genome assembly number: NCBI m37.

Asterisks indicate fosmids previously used in \*Morey et al., 2007; Morey et al., 2009; \*\*and Eskeland et al., 2010.

**Table S4. Normalised interprobe distance for A1 & P1 and A2 & P2 cell lines**

| Cell line | <i>Hoxd3-Hoxd13</i> (93 kb)                               | <i>GCR-Lnp</i> (89 kb) | <i>Rcn-Rpl10</i> (166 kb) |
|-----------|-----------------------------------------------------------|------------------------|---------------------------|
|           | Normalized interprobe distance ( $d^2/r^2$ )              |                        |                           |
| <b>A1</b> | 0.0056                                                    | 0.0021                 | 0.0039                    |
| <b>P1</b> | 0.0084 ( $P=0.0002$ )                                     | 0.0024 ( $P=0.05$ )    | 0.0030 ( $P=0.11$ )       |
| <b>A2</b> | 0.0060                                                    | 0.0025                 | 0.0054                    |
| <b>P2</b> | 0.0084 ( $P=0.03$ )                                       | 0.0027 ( $P=0.90$ )    | 0.0038 ( $P=0.08$ )       |
|           | Squared interprobe distance ( $d^2$ ) ( $\mu\text{m}^2$ ) |                        |                           |
| <b>A1</b> | 0.16                                                      | 0.066                  | 0.11                      |
| <b>P1</b> | 0.25 ( $P<0.0001$ )                                       | 0.073 ( $P=0.34$ )     | 0.09 ( $P=0.14$ )         |
| <b>A2</b> | 0.20                                                      | 0.09                   | 0.18                      |
| <b>P2</b> | 0.27 ( $P=0.02$ )                                         | 0.08 ( $P=0.88$ )      | 0.12 ( $P=0.10$ )         |

Statistical analysis of data for Fig. 4. Interprobe distances are median values;  $P$ -values from Mann-Whitney U tests.

**Table S5. Interprobe distances for E11 limb bud sections**

| Limb region        | <i>Hoxd3-Hoxd13</i> (93 kb)                       | <i>GCR-Lnp</i> (89 kb) | <i>Rcn-Rpl10</i> (166 kb) |
|--------------------|---------------------------------------------------|------------------------|---------------------------|
|                    | Interprobe distance ( $d^2$ ) ( $\mu\text{m}^2$ ) |                        |                           |
| Distal posterior   | 0.178                                             | 0.076                  | 0.080                     |
| Distal anterior    | 0.116 ( $P=0.0008$ )                              | 0.076 ( $P=0.93$ )     | 0.081 ( $P=0.10$ )        |
| Proximal posterior | 0.153 ( $P=0.02$ )                                | 0.076 ( $P=0.46$ )     | 0.090 ( $P=0.06$ )        |
| Proximal anterior  | 0.098 ( $P=0.0002$ )                              | 0.074 ( $P=0.45$ )     | 0.112 ( $P=0.05$ )        |
| Flank              | 0.130 ( $P=0.0002$ )                              | 0.078 ( $P=0.49$ )     | 0.112 ( $P=0.17$ )        |

Statistical analysis of data for Fig. 5. Interprobe distances are median values,  $P$ -values from Mann-Whitney U tests.

**Table S6. Frequency of HoxD GCR and *Pax6* apposite probes separated by  $\geq 600$  nm for E11 limb bud sections**

| Limb region        | <i>Hoxd3-Hoxd13</i> (93 kb) | GCR- <i>Lnp</i> (89 kb) | <i>Rcn-Rpl10</i> (166 kb) |
|--------------------|-----------------------------|-------------------------|---------------------------|
|                    | Frequency (%) $\geq 600$ nm |                         |                           |
| Distal posterior   | 27                          | 5                       | 4                         |
| Distal anterior    | 8 ( $P=0.0001$ )            | 4 ( $P=1.00$ )          | 12 ( $P=0.02$ )           |
| Proximal posterior | 7 ( $P=0.0001$ )            | 0 ( $P=0.12$ )          | 4 ( $P=0.44$ )            |
| Proximal anterior  | 9 ( $P=0.001$ )             | 5 ( $P=1.00$ )          | 14 ( $P=0.009$ )          |
| Flank              | 3.5 ( $P=0.0001$ )          | 0 ( $P=0.12$ )          | 4 ( $P=0.44$ )            |

Statistical analysis of data for Fig. S3. *P*-values from Fisher's exact tests.

**Table S7. Interprobe distances for HoxD regulatory regions in E11 limb bud sections**

| Limb region               | <i>Hoxd13</i> -GCR (231 kb)                       | Island III-GCR (201 kb) | <i>Hoxd13</i> -island III (432 kb) |
|---------------------------|---------------------------------------------------|-------------------------|------------------------------------|
|                           | Interprobe distance ( $d^2$ ) ( $\mu\text{m}^2$ ) |                         |                                    |
| <b>Distal posterior</b>   | 0.076                                             | 0.084                   | 0.072                              |
| <b>Distal anterior</b>    | 0.098 ( $P=0.04$ )                                | 0.087 ( $P=0.43$ )      | 0.067 ( $P=0.96$ )                 |
| <b>Proximal posterior</b> | 0.107 ( $P=0.002$ )                               | 0.098 ( $P=0.99$ )      | 0.085 ( $P=0.11$ )                 |
| <b>Proximal anterior</b>  | 0.098 ( $P=0.02$ )                                | 0.094 ( $P=1.00$ )      | 0.099 ( $P=0.005$ )                |
| <b>Flank</b>              | 0.171 ( $P=0.0001$ )                              | 0.098 ( $P=0.77$ )      | 0.081 ( $P=0.04$ )                 |

Statistical analysis of data for Fig. 6B. Interprobe distances are median values;  $P$ -values from Mann-Whitney U tests.

**Table S8. Colocalisation frequency of 5' HoxD and enhancer probes for E11 limb bud sections**

| Limb region        | <i>Hoxd13</i> -GCR (231 kb)  | Island III-GCR (201 kb) | <i>Hoxd13</i> -island III (432 kb) |
|--------------------|------------------------------|-------------------------|------------------------------------|
|                    | Colocalisation frequency (%) |                         |                                    |
| Distal posterior   | 30                           | 13                      | 19                                 |
| Distal anterior    | 14 ( $P=0.01$ )              | 11 ( $P=0.83$ )         | 14 ( $P=0.30$ )                    |
| Proximal posterior | 5 ( $P<0.0001$ )             | 11 ( $P=0.839$ )        | 16 ( $P=0.61$ )                    |
| Proximal anterior  | 8 ( $P=0.0001$ )             | 13 ( $P=1.00$ )         | 13 ( $P=0.22$ )                    |
| Flank              | 7 ( $P<0.0001$ )             | 12 ( $P=1.00$ )         | 10 ( $v0.07$ )                     |

Statistical analysis of data for Fig. 6C.  $P$ -values from Fisher's Exact tests.
