# Supplementary figures and images for: Anterior-posterior differences in HoxD chromatin topology in limb development
Source: Oxford University Press journal article supplement (doi:10.1242/dev.081174), 2012-08-07

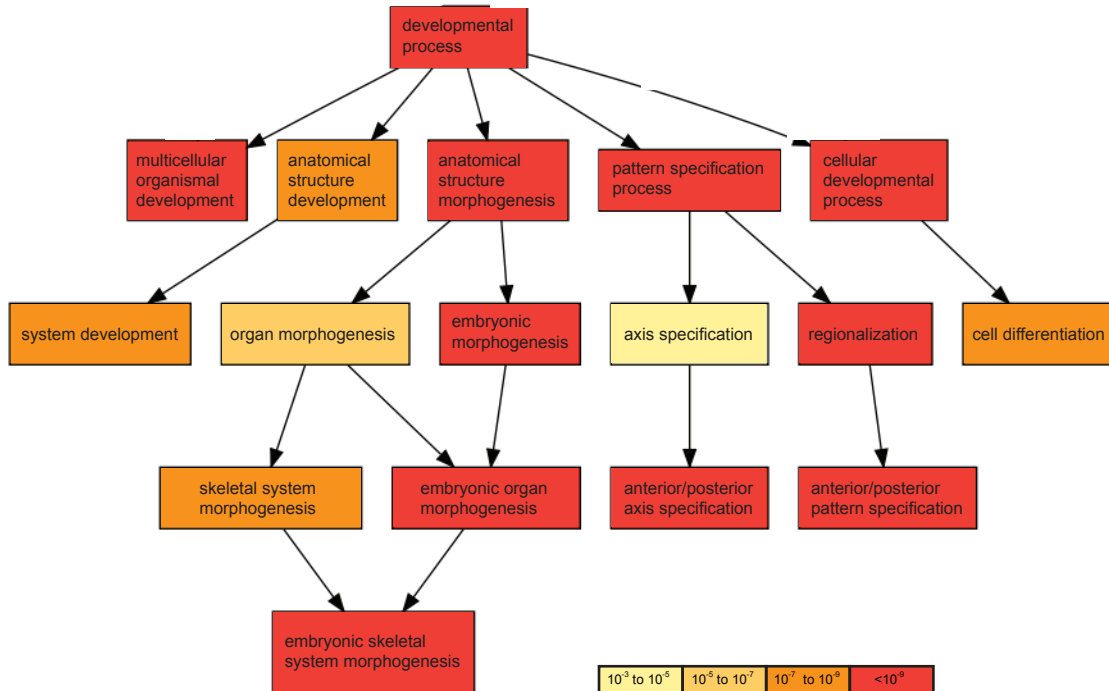

Supplement: dev081174figs1.pdf [file dev081174figs1.pdf]

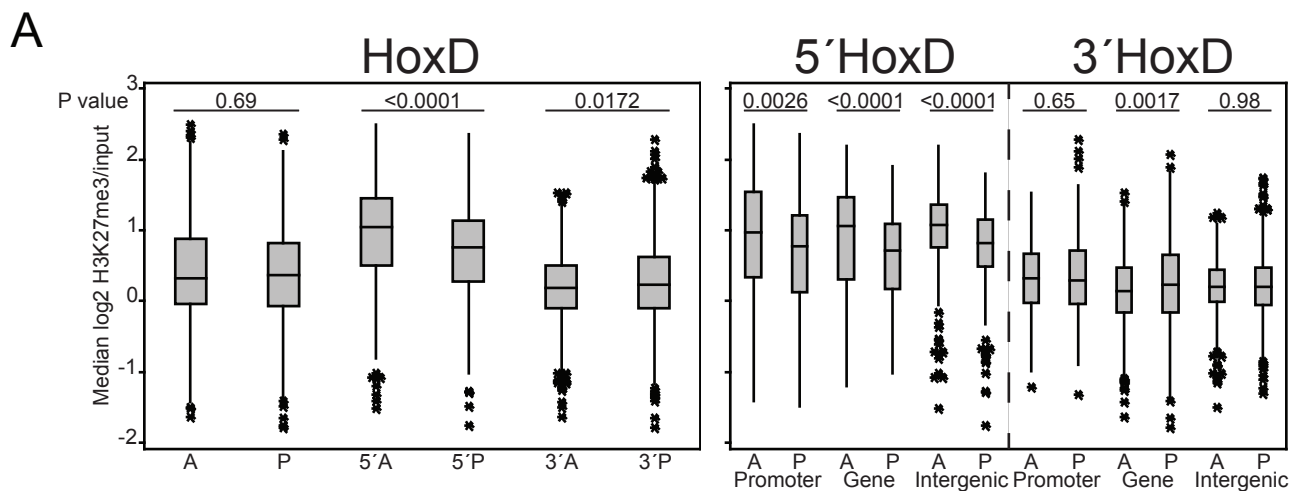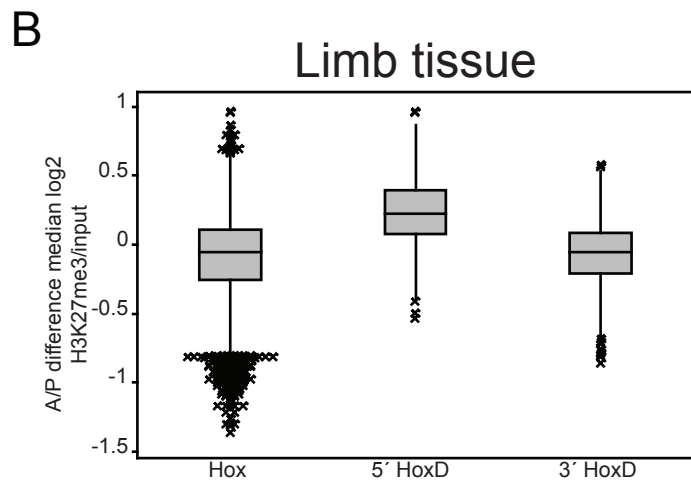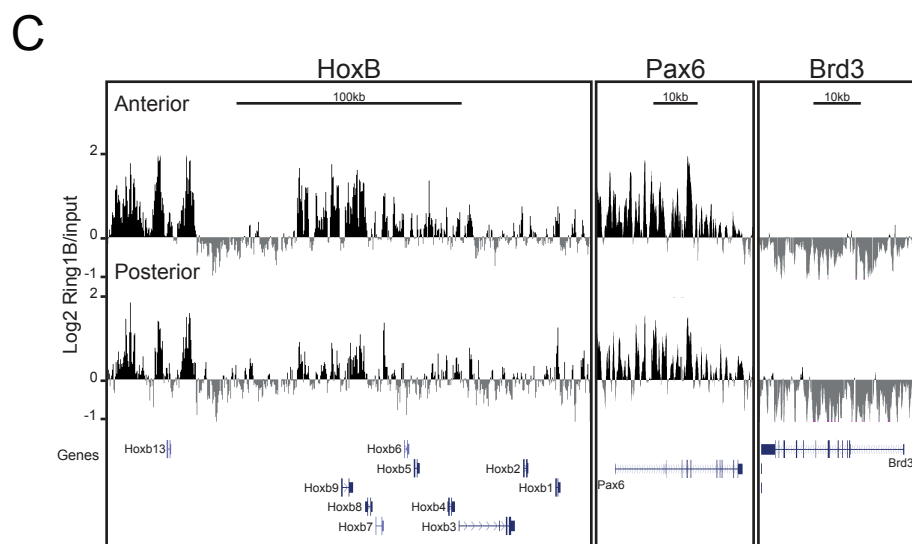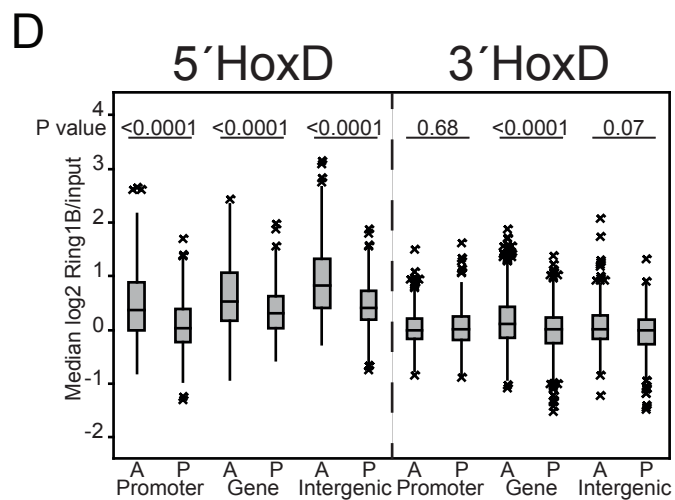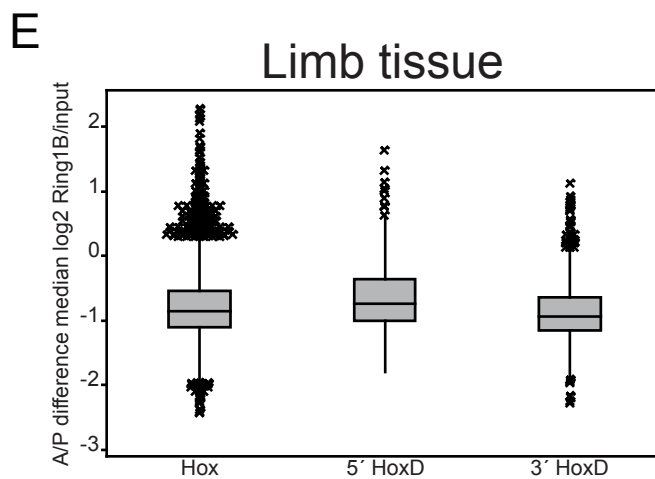

Supplement: dev081174figs2.pdf [file dev081174figs2.pdf]

**A**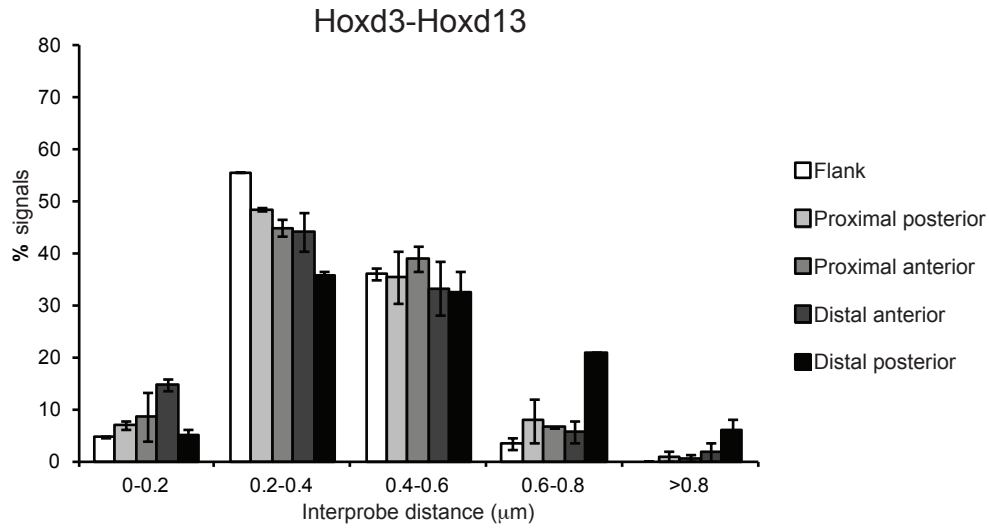**B**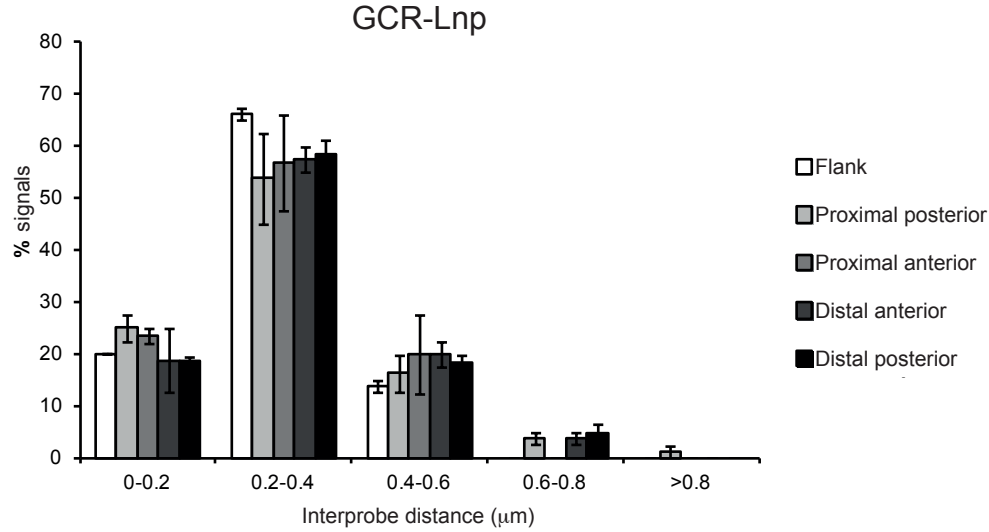**C**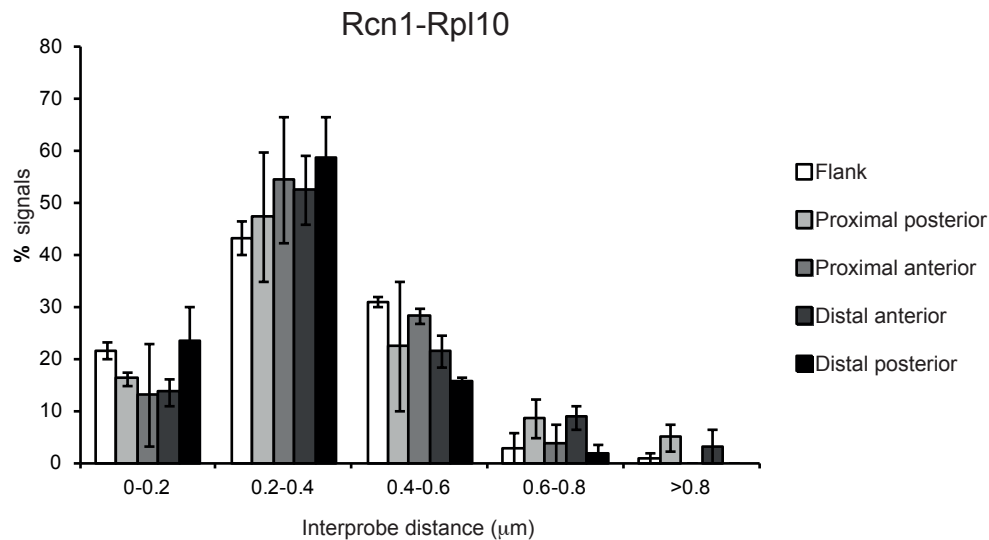

Supplement: dev081174figs3.pdf [file dev081174figs3.pdf]

A

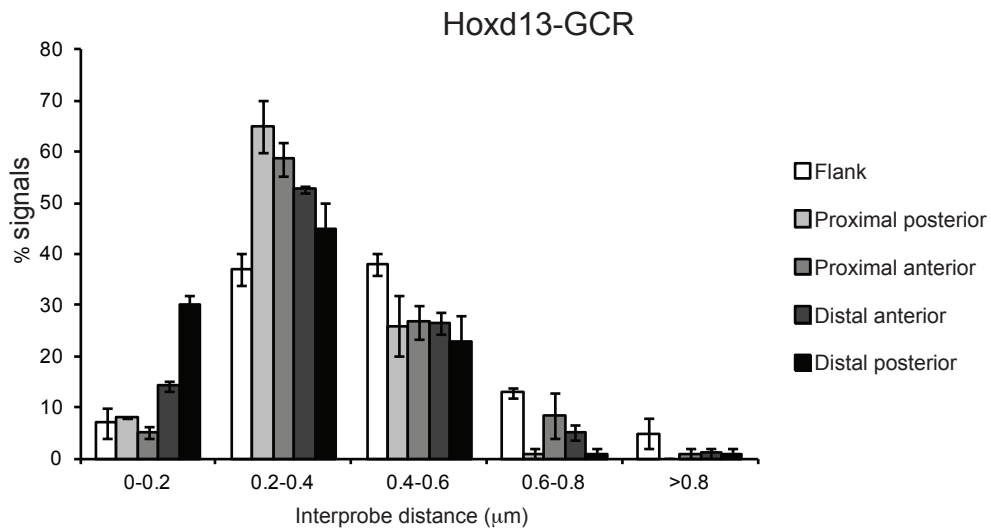

B

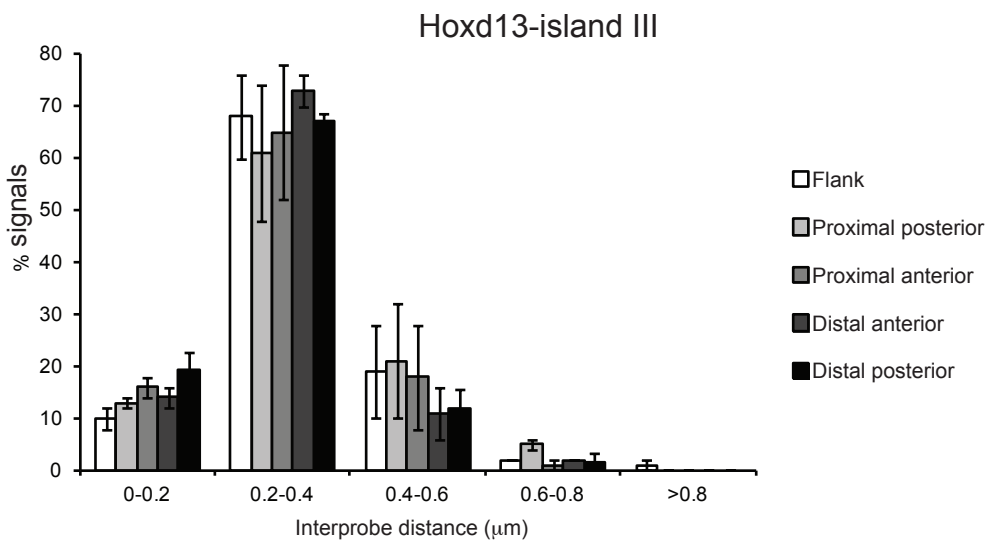

C

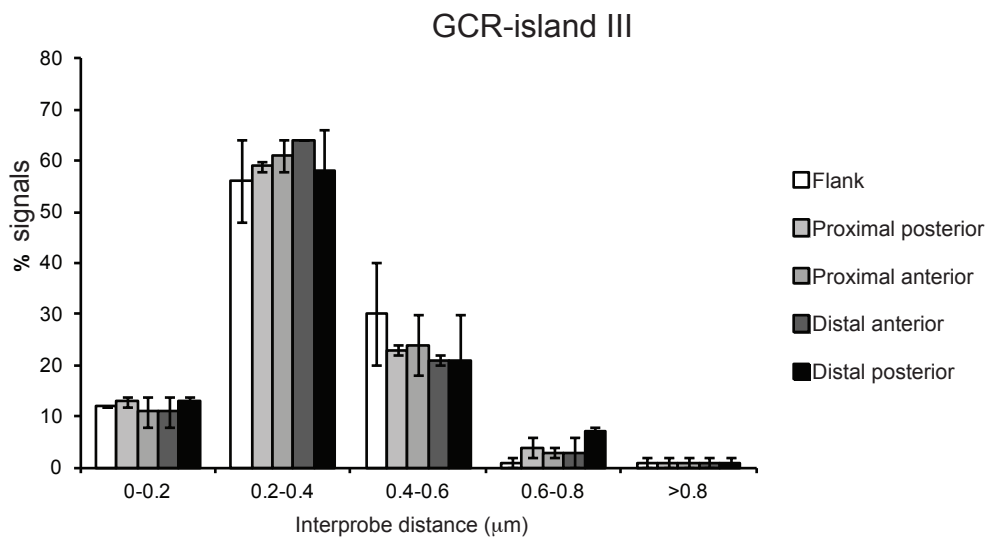

Supplement: dev081174figs4.pdf [file dev081174figs4.pdf]

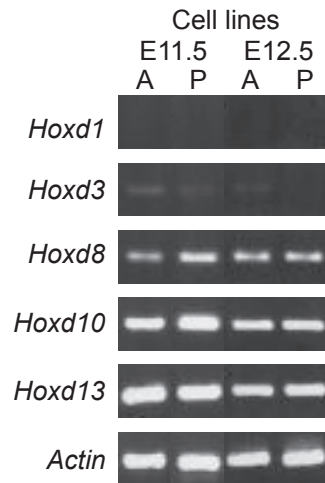

Supplement: dev081174figs5.pdf [file dev081174figs5.pdf]
